# Supplementary material for: Oxidovanadium(iv), oxidomolybdenum(vi) and cobalt(iii) complexes of o-phenylenediamine derivatives: oxidative dehydrogenation and photoluminescence
Source: Royal Society of Chemistry journal article supplement (doi:10.1039/c3qi00103b), 2014-01-01
Supplement: c3qi00103b1.pdf [file c3qi00103b1.pdf]

*Electronic Supporting Information*

**Oxidovanadium(IV), Oxidomolybdenum(VI) and Cobalt(III)  
Complexes of o-Phenylenediamine Derivatives: Oxidative  
Dehydrogenation and Photoluminescence**

*Satyabrata Chaudhuri,<sup>†</sup> Sachinath Bera,<sup>†</sup> Manas Kumar Biswas,<sup>†</sup> Amit Saha Roy,<sup>†</sup> Thomas*

*Weyhermüller,<sup>‡</sup> and Prasanta Ghosh<sup>\*,†</sup>*

*<sup>†</sup>Department of Chemistry, R. K. Mission Residential College, Narendrapur, Kolkata-103, India*

*<sup>‡</sup>Max-Planck-Institut für Chemische Energiekonversion, Stiftstrasse 34-36 / D-45470 Mülheim*

*an der Ruhr, Germany*

\* To whom corresponding should be addressed. Email: [ghosh@pghosh.in](mailto:ghosh@pghosh.in)

Phone: +91-33-2428-7347; Fax: +91-33-2477-3597

# Content

|                                                                                                                                                                                                 | <i>Page</i> |
|-------------------------------------------------------------------------------------------------------------------------------------------------------------------------------------------------|-------------|
| UV-vis/NIR absorption spectra of $L_3H_2$ , $L_3^{t-Bu}H_2$ , 3, 4, 5 and 6 in $CH_2Cl_2$ at 298 K                                                                                              | 3           |
| Cyclic voltammogram of 3 in $CH_2Cl_2$ at 298 K                                                                                                                                                 | 3           |
| X-band EPR spectra of (a) 3 in $CH_2Cl_2$ at 298 K (b) frozen $CH_2Cl_2$ glass of 3 at 25 K (c) 4 in $CH_2Cl_2$ at 298 K                                                                        | 4           |
| Fluorescence spectra of 5 and 6 in $CH_2Cl_2$ at 298 K                                                                                                                                          | 5           |
| Photoactive molecular orbitals                                                                                                                                                                  | 5           |
| Schematic diagram of the ligand fragmentation considered in MO analyses                                                                                                                         | 6           |
| Calculated bond lengths (Å) of 3, $3^+$ and 6                                                                                                                                                   | 6           |
| Excitation energies ( $\lambda/nm$ ), oscillator strengths (f), transition types, and dominant contributions of UV-vis/NIR absorption bands of 6, 3 and $3^+$ obtained from TD DFT calculations | 7           |
| Population analyses of selected molecular orbitals of 6, 3 and $3^+$                                                                                                                            | 8           |
| Optimized coordinates of 3, $3^+$ and 6                                                                                                                                                         | 9           |

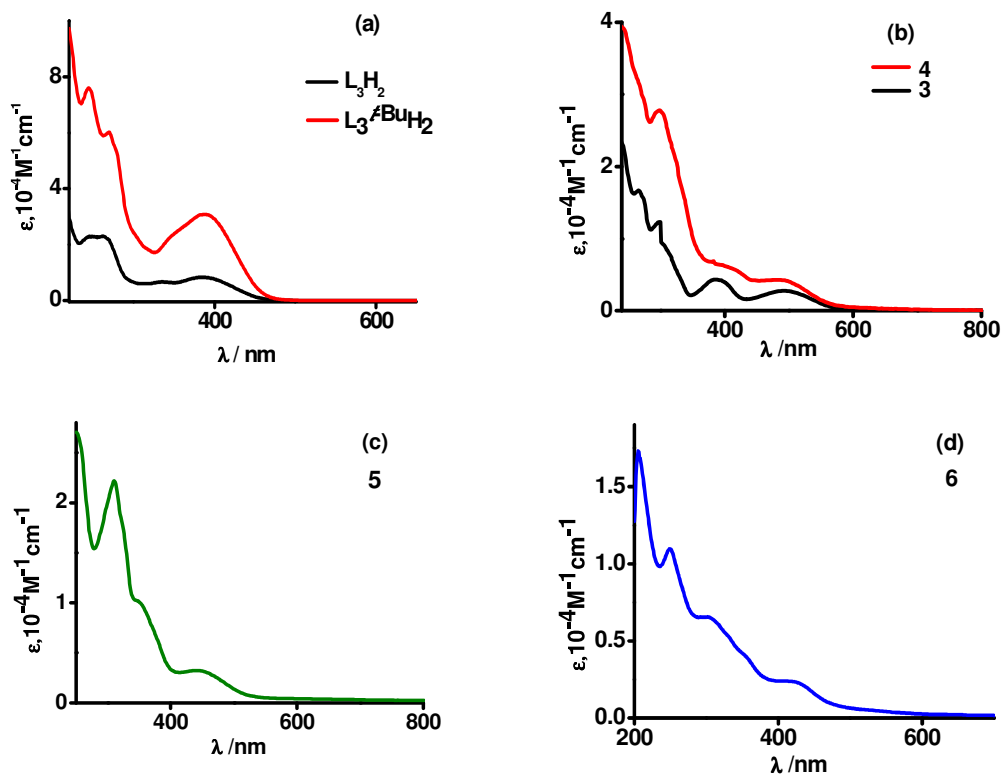

**Fig. S1** UV-vis/NIR absorption spectra of (a)  $\text{L}_3\text{H}_2$  (black) and  $\text{L}_3^{\text{t-Bu}}\text{H}_2$  (red) (b) **3** (red) and **4** (black) (c) **5** and (d) **6** in  $\text{CH}_2\text{Cl}_2$  at 298 K.

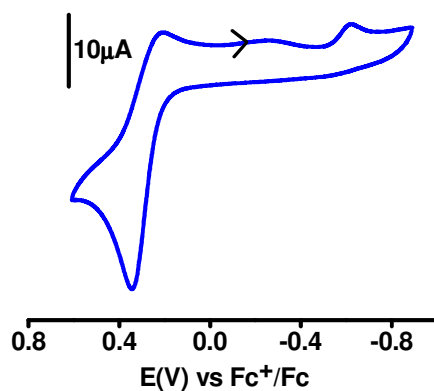

**Fig. S2** Cyclic voltammogram of **3** in  $\text{CH}_2\text{Cl}_2$  at 298 K. Conditions: 0.2 M  $[\text{N}(n\text{-Bu})_4]\text{PF}_6$  supporting electrolyte; scan rate  $100 \text{ mVs}^{-1}$ ; platinum working electrode.

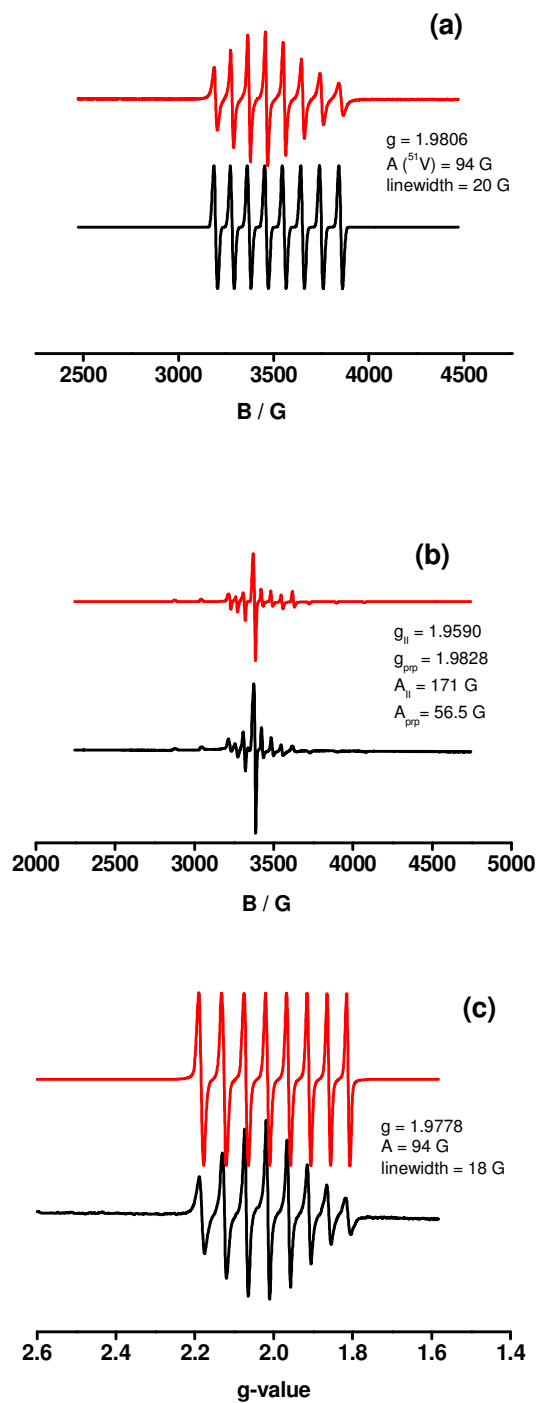

**Fig. S3** X-band EPR spectra of (a) **3** in  $\text{CH}_2\text{Cl}_2$  at 298 K (b) frozen  $\text{CH}_2\text{Cl}_2$  glass of **3** at 25 K (c) **4** in  $\text{CH}_2\text{Cl}_2$  at 298 K (black, experimental spectra; red, simulated spectra).

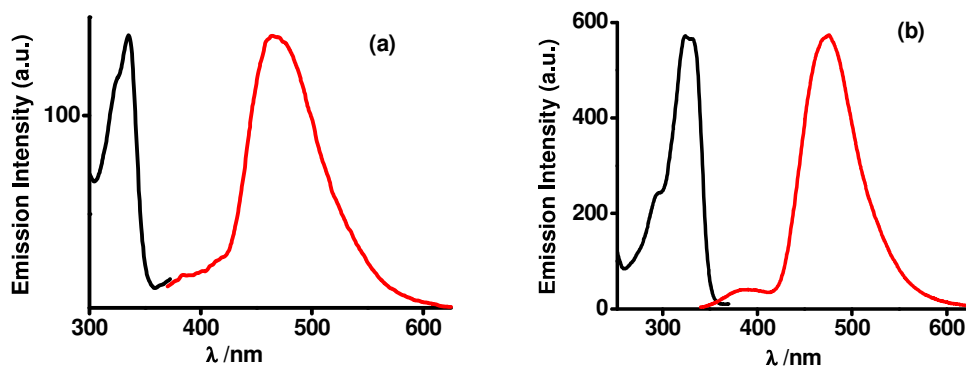

**Fig. S4** Fluorescence spectra of (a) **5** and (b) **6** (black, excitation spectra; red, emission spectra) in  $\text{CH}_2\text{Cl}_2$  at 298 K.

**Scheme S1** Photoactive molecular orbitals (EM = Emission; NRD = Non-radiative decay)

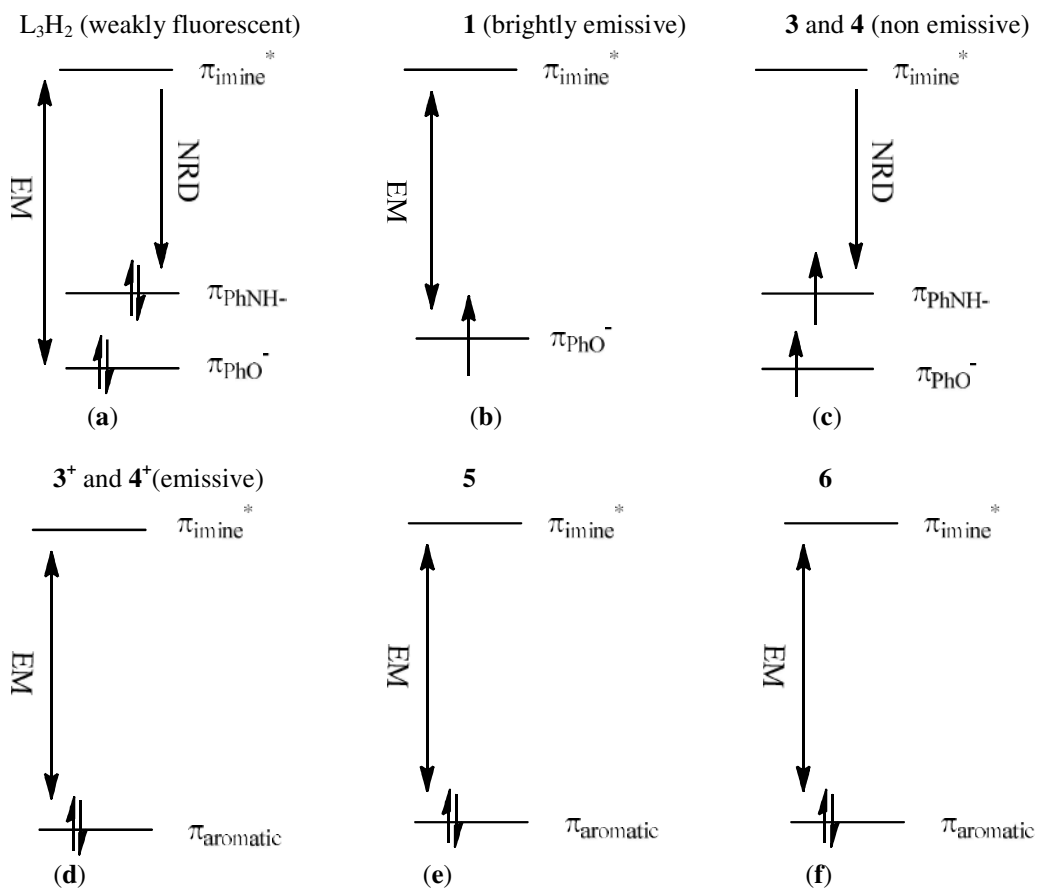

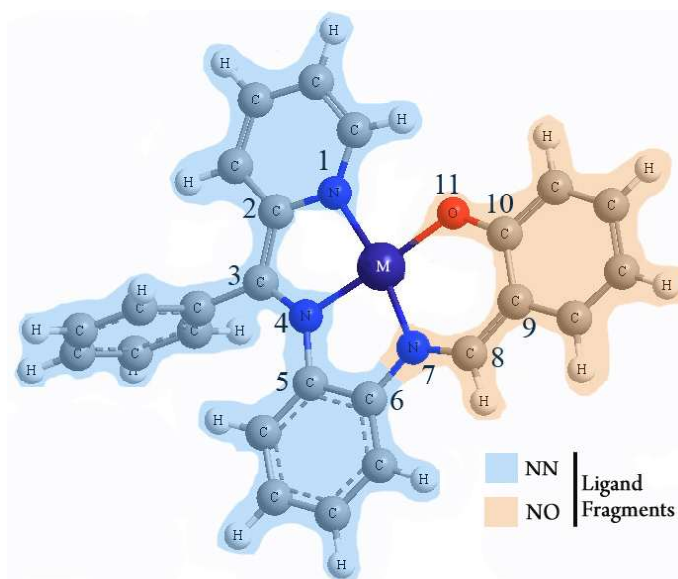

**Fig. S5** Schematic diagram of the ligand fragmentation considered in MO analyses (Table S3).

**Table S1** Calculated bond lengths (Å) of **3**, **3<sup>+</sup>** and **6** (Fig. S5)

|             | <b>3</b> (M = V) | <b>3<sup>+</sup></b> (M = V) | <b>6</b> (M = Co) |
|-------------|------------------|------------------------------|-------------------|
| M-N(7)      | 2.066            | 2.062                        | 1.896             |
| M-N(4)      | 1.968            | 1.919                        | 1.916             |
| M-N(1)      | 2.110            | 2.052                        | 1.945             |
| M-O(11)     | 1.923            | 1.794                        | 1.888             |
| N(4)-C(3)   | 1.448            | 1.465                        | 1.299             |
| C(3)-C(2)   | 1.530            | 1.513                        | 1.476             |
| C(2)-N(1)   | 1.348            | 1.349                        | 1.355             |
| N(16)-C(15) | 1.381            | 1.393                        | 1.406             |
| C(5)-C(6)   | 1.428            | 1.416                        | 1.423             |
| C(6)-N(7)   | 1.414            | 1.407                        | 1.404             |
| N(7)-C(8)   | 1.302            | 1.305                        | 1.306             |
| C(8)-C(9)   | 1.435            | 1.437                        | 1.420             |
| C(9)-C(10)  | 1.435            | 1.423                        | 1.443             |
| C(10)-O(11) | 1.316            | 1.350                        | 1.293             |
| M-O (Oxo)   | 1.599            | 1.580                        | -                 |
| M-Cl (Avg.) | -                | -                            | 2.306             |

**Table S2** Excitation energies ( $\lambda/\text{nm}$ ), oscillator strengths ( $f$ ), transition types, and dominant contributions of UV-vis/NIR absorption bands of **6**, **3** and **3<sup>+</sup>** obtained from TD DFT calculations

| $\lambda_{\text{calc}} / \text{nm}$ | $f$    | $\lambda_{\text{exp}}$ | Significant contributions (>10%)                                                        | Transition types                                                                                                                                                                                                                                                                                                                                                                                                                                                           | Dominant contributions            |
|-------------------------------------|--------|------------------------|-----------------------------------------------------------------------------------------|----------------------------------------------------------------------------------------------------------------------------------------------------------------------------------------------------------------------------------------------------------------------------------------------------------------------------------------------------------------------------------------------------------------------------------------------------------------------------|-----------------------------------|
| <b>6</b>                            |        |                        |                                                                                         |                                                                                                                                                                                                                                                                                                                                                                                                                                                                            |                                   |
| 591.5                               | 0.0394 |                        | HOMO→LUMO (97%)                                                                         | $\pi_{\text{NO}}(84) \rightarrow \pi_{\text{NN}}^*(92)$                                                                                                                                                                                                                                                                                                                                                                                                                    | LLCT                              |
| 421.8                               | 0.0891 | 423                    | HOMO-1→LUMO (10%)<br>HOMO→LUMO+2 (54%)                                                  | $\pi_{\text{NO}}(14)+\text{p}_{\text{Cl}}(76) \rightarrow \pi_{\text{NN}}^*(92)$<br>$\pi_{\text{NO}}(84) \rightarrow \pi_{\text{NN}}^*(33)+\pi_{\text{NO}}^*(65)$                                                                                                                                                                                                                                                                                                          | MLCILCT<br>LLCT                   |
| 412.2                               | 0.0684 |                        | HOMO-15→LUMO+3 (28%)<br>HOMO-10→LUMO+3 (11%)<br>HOMO-1→LUMO (20%)<br>HOMO→LUMO+2 (25%)  | $\text{d}_{\text{Co}}(71)+\pi_{\text{NO}}(18) \rightarrow \pi_{\text{NN}}^*(99)$<br>$\pi_{\text{NN}}(85)+\pi_{\text{NO}}(11) \rightarrow \pi_{\text{NN}}^*(99)$<br>$\pi_{\text{NO}}(14)+\text{p}_{\text{Cl}}(76) \rightarrow \pi_{\text{NN}}^*(92)$<br>$\pi_{\text{NO}}(84) \rightarrow \pi_{\text{NN}}^*(33)+\pi_{\text{NO}}^*(65)$                                                                                                                                       | MMLLCT<br>LLCT<br>MLCILCT<br>LLCT |
| 410.5                               | 0.1537 |                        | HOMO-15→LUMO+3 (15%)<br>HOMO-1→LUMO (59%)                                               | $\text{d}_{\text{Co}}(71)+\pi_{\text{NO}}(18) \rightarrow \pi_{\text{NN}}^*(99)$<br>$\pi_{\text{NO}}(14)+\text{p}_{\text{Cl}}(76) \rightarrow \pi_{\text{NN}}^*(92)$                                                                                                                                                                                                                                                                                                       | MMLLCT<br>MLCILCT                 |
| 396.4                               | 0.0222 |                        | HOMO-15→LUMO+1 (21%)<br>HOMO-10→LUMO+1 (24%)                                            | $\text{d}_{\text{Co}}(71)+\pi_{\text{NO}}(18) \rightarrow \text{d}_{\text{Co}}(57)+\text{p}_{\text{Cl}}(33)$<br>$\pi_{\text{NN}}(85)+\pi_{\text{NO}}(11) \rightarrow \text{d}_{\text{Co}}(57)+\text{p}_{\text{Cl}}(33)$                                                                                                                                                                                                                                                    | d-d<br>LMCT                       |
| 360.9                               | 0.0131 |                        | HOMO-5→LUMO (72%)<br>HOMO-2→LUMO (11%)                                                  | $\text{p}_{\text{Cl}}(93) \rightarrow \pi_{\text{NN}}^*(92)$<br>$\text{p}_{\text{Cl}}(82) \rightarrow \pi_{\text{NN}}^*(92)$                                                                                                                                                                                                                                                                                                                                               | CILCT<br>CILCT                    |
| 350.9                               | 0.1472 | 352                    | HOMO-6→LUMO (15%)<br>HOMO-5→LUMO (22%)<br>HOMO-2→LUMO (42%)                             | $\pi_{\text{NN}}(85)+\pi_{\text{NO}}(12) \rightarrow \pi_{\text{NN}}^*(92)$<br>$\text{p}_{\text{Cl}}(93) \rightarrow \pi_{\text{NN}}^*(92)$<br>$\text{p}_{\text{Cl}}(82) \rightarrow \pi_{\text{NN}}^*(92)$                                                                                                                                                                                                                                                                | LLCT<br>CILCT<br>CILCT            |
| 344.7                               | 0.0759 |                        | HOMO-8→LUMO+1 (20%)<br>HOMO-6→LUMO (51%)                                                | $\text{d}_{\text{Co}}(19)+\pi_{\text{NN}}(19)+\pi_{\text{NO}}(58) \rightarrow \text{d}_{\text{Co}}(57)+\text{p}_{\text{Cl}}(33)$<br>$\pi_{\text{NN}}(85)+\pi_{\text{NO}}(12) \rightarrow \pi_{\text{NN}}^*(92)$                                                                                                                                                                                                                                                            | MMLMCT<br>LLCT                    |
| 341.4                               | 0.0563 |                        | HOMO-10→LUMO+1 (11%)<br>HOMO-8→LUMO+1 (17%)<br>HOMO-7→LUMO+1 (21%)<br>HOMO→LUMO+4 (11%) | $\pi_{\text{NN}}(85)+\pi_{\text{NO}}(11) \rightarrow \text{d}_{\text{Co}}(57)+\text{p}_{\text{Cl}}(33)$<br>$\text{d}_{\text{Co}}(19)+\pi_{\text{NN}}(19)+\pi_{\text{NO}}(58) \rightarrow \text{d}_{\text{Co}}(57)+\text{p}_{\text{Cl}}(33)$<br>$\text{d}_{\text{Co}}(15)+\text{p}_{\text{Cl}}(71) \rightarrow \text{d}_{\text{Co}}(57)+\text{p}_{\text{Cl}}(33)$<br>$\pi_{\text{NO}}(84) \rightarrow \text{d}_{\text{Co}}(51)+\pi_{\text{NN}}^*(35)+\pi_{\text{NO}}^*(14)$ | LMCT<br>MMLMCT<br>d-d<br>LMMLCT   |
| 336.8                               | 0.0603 | 331                    | HOMO→LUMO+4 (85%)                                                                       | $\pi_{\text{NO}}(84) \rightarrow \text{d}_{\text{Co}}(51)+\pi_{\text{NN}}^*(35)+\pi_{\text{NO}}^*(14)$                                                                                                                                                                                                                                                                                                                                                                     | LMMLCT                            |
| 318.1                               | 0.4507 | 303                    | HOMO-1→LUMO+2 (78%)                                                                     | $\pi_{\text{NO}}(14)+\text{p}_{\text{Cl}}(76) \rightarrow \pi_{\text{NN}}^*(33)+\pi_{\text{NO}}^*(65)$                                                                                                                                                                                                                                                                                                                                                                     | MLCILCT                           |
| <b>3</b>                            |        |                        |                                                                                         |                                                                                                                                                                                                                                                                                                                                                                                                                                                                            |                                   |
| 493.6                               | 0.1329 | 496                    | $\alpha$ HOMO→LUMO (44%)<br>$\beta$ HOMO→LUMO (45%)                                     | $\pi_{\text{NN}}(84) \rightarrow \pi_{\text{NN}}^*(18)+\pi_{\text{NO}}^*(75)$<br>$\pi_{\text{NN}}(84) \rightarrow \pi_{\text{NN}}^*(18)+\pi_{\text{NO}}^*(76)$                                                                                                                                                                                                                                                                                                             | LLCT<br>LLCT                      |
| 427.9                               | 0.0124 |                        | $\alpha$ HOMO-2→LUMO+8 (16%)<br>$\beta$ HOMO→LUMO+1 (43%)                               | $\text{d}_{\text{VO}}(73)+\pi_{\text{NO}}(18) \rightarrow \text{d}_{\text{VO}}(18)+\pi_{\text{NN}}^*(49)+\pi_{\text{NO}}^*(32)$<br>$\pi_{\text{NN}}(84) \rightarrow \pi_{\text{NN}}^*(92)$                                                                                                                                                                                                                                                                                 | MMLMMLCT<br>LLCT                  |
| 424.1                               | 0.0241 |                        | $\alpha$ HOMO-2→LUMO+8 (23%)<br>$\alpha$ HOMO→LUMO+1 (15%)<br>$\beta$ HOMO→LUMO+1 (20%) | $\text{d}_{\text{VO}}(73)+\pi_{\text{NO}}(18) \rightarrow \text{d}_{\text{VO}}(18)+\pi_{\text{NN}}^*(49)+\pi_{\text{NO}}^*(32)$<br>$\pi_{\text{NN}}(84) \rightarrow \pi_{\text{NN}}^*(90)$<br>$\pi_{\text{NN}}(84) \rightarrow \pi_{\text{NN}}^*(92)$                                                                                                                                                                                                                      | MMLMMLCT<br>LLCT<br>LLCT          |
| 380.5                               | 0.0493 | 386                    | $\alpha$ HOMO-2→LUMO (12%)<br>$\alpha$ HOMO-1→LUMO (20%)<br>$\beta$ HOMO-1→LUMO (20%)   | $\text{d}_{\text{VO}}(73)+\pi_{\text{NO}}(18) \rightarrow \pi_{\text{NN}}^*(18)+\pi_{\text{NO}}^*(75)$<br>$\pi_{\text{NN}}(14)+\pi_{\text{NO}}(77) \rightarrow \pi_{\text{NN}}^*(18)+\pi_{\text{NO}}^*(75)$<br>$\pi_{\text{NN}}(17)+\pi_{\text{NO}}(81) \rightarrow \pi_{\text{NN}}^*(18)+\pi_{\text{NO}}^*(76)$                                                                                                                                                           | MMLLCT<br>LLCT<br>LLCT            |
| 375.9                               | 0.0804 |                        | $\alpha$ HOMO-2→LUMO (14%)<br>$\alpha$ HOMO-1→LUMO (21%)<br>$\beta$ HOMO-1→LUMO (24%)   | $\text{d}_{\text{VO}}(73)+\pi_{\text{NO}}(18) \rightarrow \pi_{\text{NN}}^*(18)+\pi_{\text{NO}}^*(75)$<br>$\pi_{\text{NN}}(14)+\pi_{\text{NO}}(77) \rightarrow \pi_{\text{NN}}^*(18)+\pi_{\text{NO}}^*(75)$<br>$\pi_{\text{NN}}(17)+\pi_{\text{NO}}(81) \rightarrow \pi_{\text{NN}}^*(18)+\pi_{\text{NO}}^*(76)$                                                                                                                                                           | MMLLCT<br>LLCT<br>LLCT            |
| 366.1                               | 0.0181 |                        | $\alpha$ HOMO→LUMO+2 (49%)<br>$\alpha$ HOMO→LUMO+3 (32%)                                | $\pi_{\text{NN}}(84) \rightarrow \pi_{\text{NN}}^*(98)$<br>$\pi_{\text{NN}}(84) \rightarrow \text{d}_{\text{VO}}(65)+\pi_{\text{NN}}^*(30)$                                                                                                                                                                                                                                                                                                                                | LLCT<br>LMMLCT                    |
| 357.1                               | 0.0114 |                        | $\alpha$ HOMO→LUMO+3 (19%)<br>$\alpha$ HOMO→LUMO+5 (13%)<br>$\beta$ HOMO→LUMO+3 (13%)   | $\pi_{\text{NN}}(84) \rightarrow \text{d}_{\text{VO}}(65)+\pi_{\text{NN}}^*(30)$<br>$\pi_{\text{NN}}(84) \rightarrow \text{d}_{\text{VO}}(19)+\pi_{\text{NN}}^*(77)$<br>$\pi_{\text{NN}}(84) \rightarrow \text{d}_{\text{VO}}(75)+\pi_{\text{NN}}^*(19)$                                                                                                                                                                                                                   | LMMLCT<br>LMMLCT<br>LMMLCT        |
| 337.1                               | 0.0121 | 327                    | $\alpha$ HOMO→LUMO+2 (16%)<br>$\alpha$ HOMO→LUMO+4 (25%)<br>$\beta$ HOMO→LUMO+3 (20%)   | $\pi_{\text{NN}}(84) \rightarrow \pi_{\text{NN}}^*(98)$<br>$\pi_{\text{NN}}(84) \rightarrow \text{d}_{\text{VO}}(10)+\pi_{\text{NN}}^*(89)$<br>$\pi_{\text{NN}}(84) \rightarrow \text{d}_{\text{VO}}(75)+\pi_{\text{NN}}^*(19)$                                                                                                                                                                                                                                            | LLCT<br>LMMLCT<br>LMMLCT          |
| 316.7                               | 0.1876 | 313                    | $\alpha$ HOMO-3→LUMO (39%)<br>$\beta$ HOMO-2→LUMO (42%)                                 | $\pi_{\text{NN}}(50)+\pi_{\text{NO}}(49) \rightarrow \pi_{\text{NN}}^*(18)+\pi_{\text{NO}}^*(75)$<br>$\pi_{\text{NN}}(51)+\pi_{\text{NO}}(48) \rightarrow \pi_{\text{NN}}^*(18)+\pi_{\text{NO}}^*(76)$                                                                                                                                                                                                                                                                     | LLCT<br>LLCT                      |
| 308.8                               | 0.0204 | 300                    | $\beta$ HOMO-1→LUMO+2 (55%)                                                             | $\pi_{\text{NN}}(17)+\pi_{\text{NO}}(81) \rightarrow \pi_{\text{NN}}^*(93)$                                                                                                                                                                                                                                                                                                                                                                                                | LLCT                              |
| <b>3<sup>+</sup></b>                |        |                        |                                                                                         |                                                                                                                                                                                                                                                                                                                                                                                                                                                                            |                                   |
| 640.9                               | 0.0119 |                        | HOMO-4→LUMO (11%)<br>HOMO-2→LUMO (83%)                                                  | $\pi_{\text{NN}}(21)+\pi_{\text{NO}}(77) \rightarrow \text{d}_{\text{VO}}(80)+\pi_{\text{NO}}^*(13)$<br>$\pi_{\text{NN}}(97) \rightarrow \text{d}_{\text{VO}}(80)+\pi_{\text{NO}}^*(13)$                                                                                                                                                                                                                                                                                   | LMMLCT<br>LMMLCT                  |
| 471.5                               | 0.0764 | 491                    | HOMO→LUMO+2 (80%)                                                                       | $\pi_{\text{NN}}(80)+\pi_{\text{NO}}(12) \rightarrow \text{d}_{\text{VO}}(10)+\pi_{\text{NN}}^*(26)+\pi_{\text{NO}}^*(64)$                                                                                                                                                                                                                                                                                                                                                 | LMMLCT                            |

| $\lambda_{\text{calc}} / \text{nm}$ | f      | $\lambda_{\text{exp}}$ | Significant Contributions (>10%)                                                      | Transition Types                                                                                                                                                                                                                                                                                                                                                                                                                           | Dominant Contributions               |
|-------------------------------------|--------|------------------------|---------------------------------------------------------------------------------------|--------------------------------------------------------------------------------------------------------------------------------------------------------------------------------------------------------------------------------------------------------------------------------------------------------------------------------------------------------------------------------------------------------------------------------------------|--------------------------------------|
| 439.7                               | 0.0308 |                        | HOMO-1→LUMO+1 (85%)                                                                   | $\pi_{\text{NN}}(58)+\pi_{\text{NO}}(41)\rightarrow d_{\text{VO}}(71)+\pi_{\text{NN}}^*(15)+\pi_{\text{NO}}^*(14)$                                                                                                                                                                                                                                                                                                                         | LMMLCT                               |
| 391.4                               | 0.0140 | 407                    | HOMO→LUMO+3 (39%)<br>HOMO→LUMO+5 (39%)                                                | $\pi_{\text{NN}}(80)+\pi_{\text{NO}}(12)\rightarrow d_{\text{VO}}(26)+\pi_{\text{NN}}^*(67)$<br>$\pi_{\text{NN}}(80)+\pi_{\text{NO}}(12)\rightarrow d_{\text{VO}}(50)+\pi_{\text{NN}}^*(35)+\pi_{\text{NO}}^*(15)$                                                                                                                                                                                                                         | LMMLCT<br>LMMLCT                     |
| 377.2                               | 0.0132 | 376                    | HOMO-4→LUMO+1 (35%)<br>HOMO-3→LUMO+1 (12%)<br>HOMO→LUMO+3 (22%)<br>HOMO→LUMO+5 (23%)  | $\pi_{\text{NN}}(21)+\pi_{\text{NO}}(77)\rightarrow d_{\text{VO}}(71)+\pi_{\text{NN}}^*(15)+\pi_{\text{NO}}^*(14)$<br>$\pi_{\text{NO}}(98)\rightarrow d_{\text{VO}}(71)+\pi_{\text{NN}}^*(15)+\pi_{\text{NO}}^*(14)$<br>$\pi_{\text{NN}}(80)+\pi_{\text{NO}}(12)\rightarrow d_{\text{VO}}(26)+\pi_{\text{NN}}^*(67)$<br>$\pi_{\text{NN}}(80)+\pi_{\text{NO}}(12)\rightarrow d_{\text{VO}}(50)+\pi_{\text{NN}}^*(35)+\pi_{\text{NO}}^*(15)$ | LMMLCT<br>LMMLCT<br>LMMLCT<br>LMMLCT |
| 363.2                               | 0.0122 |                        | HOMO-7→LUMO (80%)                                                                     | $\pi_{\text{NN}}(93)\rightarrow d_{\text{VO}}(80)+\pi_{\text{NO}}^*(13)$                                                                                                                                                                                                                                                                                                                                                                   | LMMLCT                               |
| 357.8                               | 0.1182 |                        | HOMO-1→LUMO+2 (61%)                                                                   | $\pi_{\text{NN}}(58)+\pi_{\text{NO}}(41)\rightarrow d_{\text{VO}}(10)+\pi_{\text{NN}}^*(26)+\pi_{\text{NO}}^*(64)$                                                                                                                                                                                                                                                                                                                         | LMMLCT                               |
| 342.5                               | 0.0119 |                        | HOMO-2→LUMO+2 (95%)                                                                   | $\pi_{\text{NN}}(97)\rightarrow d_{\text{VO}}(10)+\pi_{\text{NN}}^*(26)+\pi_{\text{NO}}^*(64)$                                                                                                                                                                                                                                                                                                                                             | LMMLCT                               |
| 326.5                               | 0.0167 | 331                    | HOMO-4→LUMO+2 (12%)<br>HOMO→LUMO+6 (70%)                                              | $\pi_{\text{NN}}(21)+\pi_{\text{NO}}(77)\rightarrow d_{\text{VO}}(10)+\pi_{\text{NN}}^*(26)+\pi_{\text{NO}}^*(64)$<br>$\pi_{\text{NN}}(80)+\pi_{\text{NO}}(12)\rightarrow \pi_{\text{NN}}^*(93)$                                                                                                                                                                                                                                           | LMMLCT<br>LLCT                       |
| 324.7                               | 0.0288 |                        | HOMO-10→LUMO (36%)<br>HOMO-4→LUMO+2 (11%)<br>HOMO-1→LUMO+5 (11%)<br>HOMO→LUMO+6 (19%) | $d_{\text{VO}}(15)+\pi_{\text{NN}}(32)+\pi_{\text{NO}}(53)\rightarrow d_{\text{VO}}(80)+\pi_{\text{NO}}^*(13)$<br>$\pi_{\text{NN}}(21)+\pi_{\text{NO}}(77)\rightarrow d_{\text{VO}}(10)+\pi_{\text{NN}}^*(26)+\pi_{\text{NO}}^*(64)$<br>$\pi_{\text{NN}}(58)+\pi_{\text{NO}}(41)\rightarrow d_{\text{VO}}(50)+\pi_{\text{NN}}^*(35)+\pi_{\text{NO}}^*(15)$<br>$\pi_{\text{NN}}(80)+\pi_{\text{NO}}(12)\rightarrow \pi_{\text{NN}}^*(93)$   | MMLMMLCT<br>LMMLCT<br>LMMLCT<br>LLCT |
| 321.9                               | 0.0182 |                        | HOMO-10→LUMO (26%)<br>HOMO-4→LUMO+2 (56%)                                             | $d_{\text{VO}}(15)+\pi_{\text{NN}}(32)+\pi_{\text{NO}}(53)\rightarrow d_{\text{VO}}(80)+\pi_{\text{NO}}^*(13)$<br>$\pi_{\text{NN}}(21)+\pi_{\text{NO}}(77)\rightarrow d_{\text{VO}}(10)+\pi_{\text{NN}}^*(26)+\pi_{\text{NO}}^*(64)$                                                                                                                                                                                                       | MMLMMLCT<br>LMMLCT                   |
| 307.2                               | 0.0332 |                        | HOMO→LUMO+7 (64%)                                                                     | $\pi_{\text{NN}}(80)+\pi_{\text{NO}}(12)\rightarrow d_{\text{VO}}(68)+\pi_{\text{NN}}^*(20)+\pi_{\text{NO}}^*(13)$                                                                                                                                                                                                                                                                                                                         | LMMLCT                               |
| 303.4                               | 0.0321 |                        | HOMO-5→LUMO+1 (55%)<br>HOMO-1→LUMO+3 (23%)                                            | $\pi_{\text{NN}}(31)+\pi_{\text{NO}}(69)\rightarrow d_{\text{VO}}(71)+\pi_{\text{NN}}^*(15)+\pi_{\text{NO}}^*(14)$<br>$\pi_{\text{NN}}(58)+\pi_{\text{NO}}(41)\rightarrow d_{\text{VO}}(26)+\pi_{\text{NN}}^*(67)$                                                                                                                                                                                                                         | LMMLCT<br>LMMLCT                     |
| 303.3                               | 0.0434 |                        | HOMO-5→LUMO+1 (26%)<br>HOMO-1→LUMO+3 (53%)                                            | $\pi_{\text{NN}}(31)+\pi_{\text{NO}}(69)\rightarrow d_{\text{VO}}(71)+\pi_{\text{NN}}^*(15)+\pi_{\text{NO}}^*(14)$<br>$\pi_{\text{NN}}(58)+\pi_{\text{NO}}(41)\rightarrow d_{\text{VO}}(26)+\pi_{\text{NN}}^*(67)$                                                                                                                                                                                                                         | LMMLCT<br>LMMLCT                     |
| 300.7                               | 0.0116 |                        | HOMO-2→LUMO+3 (95%)                                                                   | $\pi_{\text{NN}}(97)\rightarrow d_{\text{VO}}(26)+\pi_{\text{NN}}^*(67)$                                                                                                                                                                                                                                                                                                                                                                   | LMMLCT                               |

LLCT = Ligand to Ligand Charge Transfer, MLCILCT = Mixed Ligand Chloride to Ligand Charge Transfer, MMLLCT = Mixed Metal Ligand to Ligand Charge Transfer, d-d = d-d Transition, ClLCT = Chloride to Ligand Charge Transfer, MMLMCT = Mixed Metal Ligand to Metal Charge Transfer, LMCT = Ligand to Metal Charge Transfer, LMMLCT = Ligand to Mixed Metal Ligand Charge Transfer, MMLMMLCT = Mixed Metal Ligand to Mixed Metal Ligand Charge Transfer

**Table S3** Population analyses of selected molecular orbitals of **6**, **3** and **3<sup>+</sup>**

| MO      | <b>6</b> |    |    | <b>3</b> |         |          |         |          |         | <b>3<sup>+</sup></b> |    |    |
|---------|----------|----|----|----------|---------|----------|---------|----------|---------|----------------------|----|----|
|         | Co       | NN | NO | VO       |         | NN       |         | NO       |         | VO                   | NN | NO |
|         |          |    |    | $\alpha$ | $\beta$ | $\alpha$ | $\beta$ | $\alpha$ | $\beta$ |                      |    |    |
| LUMO    | 1        | 92 | 6  | 7        | 5       | 18       | 18      | 75       | 76      | 80                   | 7  | 13 |
| HOMO    | 2        | 9  | 84 | 7        | 6       | 84       | 84      | 9        | 9       | 8                    | 80 | 12 |
| HOMO-1  | 4        | 6  | 14 | 9        | 3       | 14       | 17      | 77       | 81      | 2                    | 58 | 41 |
| HOMO-2  | 8        | 3  | 6  | 73       | 1       | 9        | 51      | 18       | 48      | 0                    | 97 | 2  |
| HOMO-3  | 8        | 27 | 44 | 1        | 0       | 50       | 95      | 49       | 5       | 0                    | 98 | 2  |
| HOMO-4  | 6        | 2  | 0  | 1        | 0       | 94       | 100     | 5        | 0       | 3                    | 21 | 77 |
| HOMO-5  | 2        | 7  | 0  | 0        | 2       | 100      | 39      | 0        | 60      | 0                    | 31 | 69 |
| HOMO-6  | 2        | 85 | 12 | 2        | 28      | 40       | 26      | 59       | 47      | 2                    | 93 | 5  |
| HOMO-7  | 15       | 8  | 6  | 33       | 4       | 49       | 67      | 18       | 29      | 5                    | 93 | 1  |
| HOMO-8  | 19       | 19 | 58 | 12       | 15      | 55       | 76      | 33       | 10      | 6                    | 80 | 15 |
| HOMO-9  | 1        | 60 | 39 | 12       | 69      | 68       | 21      | 20       | 10      | 9                    | 88 | 3  |
| HOMO-10 | 4        | 85 | 11 | 66       | 24      | 22       | 69      | 11       | 7       | 15                   | 32 | 53 |
| HOMO-11 | 1        | 89 | 10 | 22       | 45      | 67       | 22      | 10       | 33      | 4                    | 95 | 1  |
| HOMO-12 | 38       | 36 | 23 | 41       | 34      | 19       | 47      | 40       | 19      | 11                   | 51 | 38 |
| HOMO-13 | 52       | 36 | 8  | 19       | 37      | 58       | 41      | 22       | 22      | 3                    | 77 | 20 |
| HOMO-14 | 14       | 75 | 9  | 43       | 26      | 38       | 67      | 19       | 7       | 5                    | 47 | 48 |
| HOMO-15 | 71       | 9  | 18 | 29       | 22      | 63       | 17      | 8        | 61      | 4                    | 83 | 13 |



**Table S4** Optimized coordinates of **3**

| SI | Symbol | X        | Y        | Z        | SI | Symbol | X        | Y        | Z        |
|----|--------|----------|----------|----------|----|--------|----------|----------|----------|
| 1  | O      | 8.147164 | 4.124388 | 13.00194 | 26 | C      | 8.690336 | -0.98481 | 8.874736 |
| 2  | C      | 8.001572 | 5.392101 | 12.67864 | 27 | C      | 8.382123 | -2.3409  | 8.731882 |
| 3  | C      | 8.927784 | 6.337502 | 13.18016 | 28 | C      | 7.564312 | -2.96576 | 9.673843 |
| 4  | C      | 8.840584 | 7.677888 | 12.84445 | 29 | C      | 7.060919 | -2.23614 | 10.75415 |
| 5  | C      | 7.831554 | 8.143669 | 11.97977 | 30 | H      | 9.709048 | 5.970464 | 13.83879 |
| 6  | C      | 6.921945 | 7.239967 | 11.46586 | 31 | H      | 9.565588 | 8.378326 | 13.25191 |
| 7  | C      | 6.968513 | 5.864152 | 11.80179 | 32 | H      | 7.772338 | 9.195693 | 11.7187  |
| 8  | C      | 6.017899 | 4.985596 | 11.18224 | 33 | H      | 6.139927 | 7.579367 | 10.78948 |
| 9  | N      | 5.857557 | 3.725785 | 11.4709  | 34 | H      | 5.412726 | 5.422217 | 10.38315 |
| 10 | C      | 4.994388 | 2.848151 | 10.77434 | 35 | H      | 3.67663  | 4.276108 | 9.836635 |
| 11 | C      | 3.925232 | 3.225618 | 9.959822 | 36 | H      | 2.309608 | 2.546198 | 8.708082 |
| 12 | C      | 3.148761 | 2.252716 | 9.331441 | 37 | H      | 2.843923 | 0.13838  | 9.042958 |
| 13 | C      | 3.449106 | 0.90057  | 9.527371 | 38 | H      | 4.719707 | -0.54766 | 10.47673 |
| 14 | C      | 4.507753 | 0.50689  | 10.34381 | 39 | H      | 6.056212 | -0.7039  | 12.58734 |
| 15 | C      | 5.306569 | 1.471796 | 10.98915 | 40 | H      | 8.531657 | -2.03277 | 13.21985 |
| 16 | N      | 6.382484 | 1.243532 | 11.82372 | 41 | H      | 10.32311 | -1.6574  | 14.91716 |
| 17 | C      | 6.852454 | -0.09347 | 12.12015 | 42 | H      | 10.75617 | 0.682757 | 15.73134 |
| 18 | C      | 7.97028  | 0.042354 | 13.15611 | 43 | H      | 9.323059 | 2.539271 | 14.81264 |
| 19 | C      | 8.725441 | -1.04091 | 13.61313 | 44 | H      | 8.417147 | 0.797796 | 10.06053 |
| 20 | C      | 9.729961 | -0.82401 | 14.55132 | 45 | H      | 9.320803 | -0.49063 | 8.140141 |
| 21 | C      | 9.974987 | 0.473852 | 15.00829 | 46 | H      | 8.771357 | -2.90353 | 7.887611 |
| 22 | C      | 9.189207 | 1.504997 | 14.51346 | 47 | H      | 7.309553 | -4.01685 | 9.565952 |
| 23 | N      | 8.207974 | 1.285723 | 13.61887 | 48 | H      | 6.409885 | -2.72341 | 11.47812 |
| 24 | C      | 7.370769 | -0.87988 | 10.90681 | 49 | V      | 6.80704  | 2.745641 | 13.0217  |
| 25 | C      | 8.189391 | -0.2592  | 9.954997 | 50 | O      | 5.82714  | 2.861401 | 14.27981 |

**Table S5** Optimized coordinates of **3<sup>+</sup>**

| SI | Symbol | X        | Y        | Z        | SI | Symbol | X        | Y        | Z        |
|----|--------|----------|----------|----------|----|--------|----------|----------|----------|
| 1  | O      | 8.259827 | 4.00035  | 12.52    | 10 | C      | 4.969604 | 2.811675 | 10.78159 |
| 2  | C      | 8.11713  | 5.337422 | 12.39937 | 11 | C      | 3.892789 | 3.164095 | 9.961542 |
| 3  | C      | 9.123176 | 6.198078 | 12.84363 | 12 | C      | 3.083213 | 2.16284  | 9.436345 |
| 4  | C      | 8.974466 | 7.570627 | 12.66625 | 13 | C      | 3.35792  | 0.817781 | 9.720863 |
| 5  | C      | 7.838842 | 8.098245 | 12.03035 | 14 | C      | 4.433123 | 0.456507 | 10.52748 |
| 6  | C      | 6.850025 | 7.244578 | 11.57044 | 15 | C      | 5.261989 | 1.455194 | 11.06607 |
| 7  | C      | 6.956597 | 5.846451 | 11.75256 | 16 | N      | 6.396953 | 1.25777  | 11.84922 |
| 8  | C      | 5.943197 | 4.980592 | 11.21542 | 17 | C      | 6.889146 | -0.09956 | 12.09521 |
| 9  | N      | 5.879513 | 3.689897 | 11.39748 | 18 | C      | 7.937971 | 0.011369 | 13.18002 |

| SI | Symbol | X        | Y        | Z        | SI | Symbol | X        | Y        | Z        |
|----|--------|----------|----------|----------|----|--------|----------|----------|----------|
| 19 | C      | 8.66092  | -1.06782 | 13.68733 | 35 | H      | 3.670644 | 4.204619 | 9.747028 |
| 20 | C      | 9.569891 | -0.85043 | 14.7179  | 36 | H      | 2.235629 | 2.426274 | 8.812431 |
| 21 | C      | 9.750153 | 0.44409  | 15.21965 | 37 | H      | 2.72315  | 0.040596 | 9.306242 |
| 22 | C      | 9.013175 | 1.477267 | 14.66723 | 38 | H      | 4.633806 | -0.59028 | 10.71859 |
| 23 | N      | 8.129022 | 1.255383 | 13.66627 | 39 | H      | 6.071935 | -0.71712 | 12.50369 |
| 24 | C      | 7.439492 | -0.81343 | 10.85902 | 40 | H      | 8.508723 | -2.05628 | 13.26846 |
| 25 | C      | 8.321345 | -0.16153 | 9.987753 | 41 | H      | 10.13543 | -1.68066 | 15.12968 |
| 26 | C      | 8.849038 | -0.8387  | 8.889094 | 42 | H      | 10.45046 | 0.648703 | 16.02164 |
| 27 | C      | 8.506445 | -2.17364 | 8.654384 | 43 | H      | 9.112388 | 2.502416 | 15.00751 |
| 28 | C      | 7.629311 | -2.82847 | 9.519823 | 44 | H      | 8.583981 | 0.878824 | 10.16146 |
| 29 | C      | 7.095949 | -2.14889 | 10.61749 | 45 | H      | 9.527711 | -0.32493 | 8.214409 |
| 30 | H      | 10.00521 | 5.78064  | 13.31746 | 46 | H      | 8.917723 | -2.69814 | 7.797026 |
| 31 | H      | 9.754018 | 8.238954 | 13.0193  | 47 | H      | 7.352144 | -3.8628  | 9.338653 |
| 32 | H      | 7.740107 | 9.169936 | 11.89431 | 48 | H      | 6.401922 | -2.66    | 11.28244 |
| 33 | H      | 5.973968 | 7.643006 | 11.06578 | 49 | V      | 7.000071 | 2.77012  | 12.86396 |
| 34 | H      | 5.186177 | 5.452797 | 10.58827 | 50 | O      | 6.024254 | 3.215215 | 14.02371 |

**Table S6** Optimized coordinates of **6**

| SI | Symbol | X        | Y        | Z        | SI | Symbol | X        | Y        | Z        |
|----|--------|----------|----------|----------|----|--------|----------|----------|----------|
| 1  | C      | 0.954017 | 1.826494 | 8.8E-06  | 21 | C      | -4.77126 | -1.41164 | -2.1E-05 |
| 2  | C      | -0.36361 | 2.363533 | 9.1E-06  | 22 | C      | -6.02764 | -0.843   | -2.5E-05 |
| 3  | C      | -0.5299  | 3.757791 | 2.3E-06  | 23 | H      | -7.1957  | 0.996462 | -2.1E-05 |
| 4  | C      | 0.5782   | 4.598736 | -5E-06   | 24 | H      | -4.6401  | -2.4895  | -2.7E-05 |
| 5  | C      | 1.874776 | 4.068228 | -6.3E-06 | 25 | H      | -6.90288 | -1.48913 | -3.5E-05 |
| 6  | C      | 2.06265  | 2.690243 | 8E-07    | 26 | C      | 1.557309 | -1.84149 | 1.5E-06  |
| 7  | H      | -1.52207 | 4.19447  | 2.6E-06  | 27 | C      | 2.436875 | -2.92727 | -5.8E-06 |
| 8  | H      | 0.430659 | 5.675297 | -1E-05   | 28 | C      | 1.907916 | -4.21995 | -9.7E-06 |
| 9  | H      | 2.737283 | 4.72818  | -1.3E-05 | 29 | H      | 3.507774 | -2.75948 | -8.5E-06 |
| 10 | H      | 3.066304 | 2.290482 | 3E-07    | 30 | C      | -0.29729 | -3.26221 | 2.8E-06  |
| 11 | N      | -1.40961 | 1.427555 | 1.33E-05 | 31 | C      | 0.524759 | -4.39314 | -5.2E-06 |
| 12 | N      | 0.990136 | 0.421301 | 1.54E-05 | 32 | H      | 2.572354 | -5.07935 | -1.6E-05 |
| 13 | C      | -2.67817 | 1.737325 | 0.000008 | 33 | H      | -1.38091 | -3.31211 | 6.4E-06  |
| 14 | H      | -2.95269 | 2.792599 | 9.6E-06  | 34 | H      | 0.078633 | -5.38227 | -8.1E-06 |
| 15 | C      | 1.974981 | -0.42567 | 5.7E-06  | 35 | N      | 0.216418 | -2.03493 | 6.4E-06  |
| 16 | C      | -3.76401 | 0.82164  | -8E-07   | 36 | O      | -2.44446 | -1.21239 | -5.3E-06 |
| 17 | C      | -5.08126 | 1.365611 | -5.1E-06 | 37 | Co     | -0.76226 | -0.35436 | 9.8E-06  |
| 18 | C      | -3.58912 | -0.61065 | -9.6E-06 | 38 | Cl     | -0.70852 | -0.35153 | 2.305328 |
| 19 | C      | -6.20017 | 0.563317 | -1.7E-05 | 39 | Cl     | -0.70849 | -0.35149 | -2.30531 |
| 20 | H      | -5.18948 | 2.448848 | 1.2E-06  | 40 | C      | 3.432489 | -0.10461 | 4E-07    |

| <b>SI</b> | <b>Symbol</b> | <b>X</b> | <b>Y</b> | <b>Z</b> | <b>SI</b> | <b>Symbol</b> | <b>X</b> | <b>Y</b> | <b>Z</b> |
|-----------|---------------|----------|----------|----------|-----------|---------------|----------|----------|----------|
| 41        | C             | 4.124387 | 0.019604 | 1.214351 | 46        | H             | 3.586632 | -0.08212 | -2.15361 |
| 42        | C             | 4.124385 | 0.019568 | -1.21436 | 47        | C             | 6.183424 | 0.418591 | -9.4E-06 |
| 43        | C             | 5.496522 | 0.284172 | 1.210959 | 48        | H             | 6.026861 | 0.384698 | 2.154162 |
| 44        | H             | 3.586635 | -0.08206 | 2.153607 | 49        | H             | 6.026858 | 0.384635 | -2.15418 |
| 45        | C             | 5.496521 | 0.284136 | -1.21097 | 50        | H             | 7.250445 | 0.624964 | -1.3E-05 |

∞END∞
